# Supplementary material for: Engineering the core–shell structure CoMnOx@OTS cubic catalyst with excellent water resistance for low-temperature catalytic combustion of VOCs
Source: Royal Society of Chemistry journal article supplement (doi:10.1039/d4en00292j), 2024-01-01
Supplement: d4en00292j1.pdf [file d4en00292j1.pdf]

## Supporting information

### **Engineering the core shell structure CoMnO<sub>x</sub>@OTS cubic catalyst with excellent water resistant for low-temperature catalytic combustion of VOCs**

Jie Wang<sup>a, b</sup>, Fang Dong<sup>a</sup>, Dan Yang<sup>a, b</sup>, Weiliang Han<sup>a</sup>, Weigao Han<sup>a</sup>, Zhicheng Tang<sup>a\*</sup>, Lei Niu<sup>b\*</sup>

*(a. State Key Laboratory for Oxo Synthesis and Selective Oxidation, and National Engineering Research Center for Fine Petrochemical Intermediates, Lanzhou Institute of Chemical Physics, Chinese Academy of Sciences, Lanzhou, 730000, China.*

*b. School of Petroleum and Chemical, Lanzhou University of Technology, Lanzhou 730070, China)*

---

\*Corresponding author.

E-mail address: [tangzhicheng@licp.cas.cn](mailto:tangzhicheng@licp.cas.cn) (Z. Tang).

## 1. Catalyst Characterizations

The morphology structure of the precursors and samples was verified by a scanning electron microscope (SEM) and Transmission electron microscopy (TEM) analysis. Among, SEM image was recorded on a JSM-6701F emission scanning electron microscopy, and TEM image was carried out on a JEOL JEM-2010 transmission electron microscope equipped with an Oxford energy dispersive X-ray (EDX) spectrometer attachment operating at 200kV. For TEM analysis, the samples were uniformly dispersed in the ethanol solution, which were in further installed on double sided adhesive tape.

To determine the types of organic functional group, the existing form of polymer bonds and the structure of the samples, Fourier transform infrared spectroscopy (FTIR) spectrum were conducted on the Thermo Nicolet Avatar 380 FTIR spectrometer. Moreover, the samples surface was saturated with  $\text{NH}_3$  to separate the Brønst and Lewis acid sites.

X-ray diffraction (XRD) analysis was conducted to explore the crystal phase of samples, which was recorded on a Rigaku D/MAX-RB X-ray diffractometer with  $\text{Cu K}\alpha$  radiation ( $\lambda = 1.5418 \text{ \AA}$ ) and run in the range of  $10\text{-}90^\circ$  with 60 kV and 55 mA.

$\text{N}_2$  adsorption-desorption was conducted on a Micromeritics ASAP 2010 instrument, and the specific surface area of the sample was determined by nitrogen adsorption in accordance with the Brunauer Emmett and Teller (BET) method. Before measurements, the sample was degassed at  $150^\circ\text{C}$  for 6 h, and BET surface area determination was calculated through six measurements at relative pressures of  $\text{N}_2$  in

the range of 0.05-1.00.

H<sub>2</sub>-Temperature program reduction (H<sub>2</sub>-TPR) was performed by automatic multi-function adsorption apparatus. The mixed gas of 5 vol.% H<sub>2</sub> and 95 vol.% N<sub>2</sub> was introduced into the quartz tube reactor. After that, 50 mg sample was put in the quartz tube reactor. Before test, the sample was purged with pure N<sub>2</sub> gas at 400 °C for 2 h, and then the test was conducted from 30 °C to 800 °C with a heating rate of 10 °C min<sup>-1</sup>.

X-ray photoelectron spectroscopy (XPS) analysis was carried on a VG ESCALAB 210 Electron Spectrometer using Mg Ka radiation ( $h\nu= 1253.6$  eV) to determine the chemical states of elements in these samples.

To explore the formation of defect structure, A RM 2000 microscope confocal Raman spectrometer (Renishaw PLC) with 532 nm laser was used.

Besides, in order to investigate the effect of acidity, NH<sub>3</sub>-Temperature program desorption (NH<sub>3</sub>-TPD) was conducted by automatic multi-function adsorption apparatus. The 80 mg samples were put in the quartz tube reactor and purged with pure N<sub>2</sub> gas at 400 °C for 2 h, and then the adsorbing gas of 5 vol. % NH<sub>3</sub> and 95 vol. % N<sub>2</sub> was passed into the quartz tube reactor. Finally, the experiment was conducted from 30 °C to 850 °C.

O<sub>2</sub>-Temperature program desorption (O<sub>2</sub>-TPD) was used to investigate the types of oxygen species in these samples. Firstly, 50 mg samples were putted into the quartz tube reactor, and then they were purged with pure N<sub>2</sub> gas at 400 °C for 2 h. After that, the mixture gas of 5 vol.% O<sub>2</sub> and 95 vol.% N<sub>2</sub> was introduced at 30 °C for 1h, and then the pure He gas was used to remove the unabsorbed O<sub>2</sub> molecules at 30 °C for 30 min.

Ultimately, the samples were heated from 30 °C to 900 °C.

In situ diffuse reflectance infrared fourier transform spectroscopy (in situ DRIFTS) was collected on Bruker V70. The powder samples were degassed in N<sub>2</sub> gas with 25 mL/min gas volume at 400 °C for 30 min. After that, the samples were cooled to room temperature. Accordingly, a background spectrum was respectively gathered at 100, 150, 200, and 250 °C. Toluene is introduced continuously by a bubbling method with N<sub>2</sub> as a carrier gas at 200°C for 30 min. To remove the weakly adsorbed toluene molecule, the samples were purged with He gas for another 30 min. Thereafter, a pure N<sub>2</sub> gas and a mixture reaction gas of 20 vol % O<sub>2</sub>/N<sub>2</sub> (25 mL/min) were respectively introduced into the in suit cell to react with toluene as requires. Finally, the samples were further heated to 100, 150, 200 and 250°C to collect the corresponding spectra, respectively.

## **2. Catalytic activity measurements**

Tests of activity and stability were essential for probing catalytic performance, mainly with the help of fixed-bed reactor. By pressing and sieving (40-60 mesh), it was possible to obtain 0.4 g of sample, to which 0.7 g of silica (SiO<sub>2</sub>) was subsequently added. The catalyst and SiO<sub>2</sub> were mixed well and poured into the thermostatic zone of the reaction tube, which was stuffed with cotton. The catalyst was exposed to a mixture of toluene (3000 ppm) and air with a flow rate of 200 mL/min and a weight hourly space velocity (WHSV) of 30 000 mL·g<sup>-1</sup>·h<sup>-1</sup>. An on-line gas chromatograph (GC-6820, Agilent, USA) equipped with a flame ionization detector (FID) was used to detect the concentration of the reactants. Usually, the activity was distinguished by the reaction

temperature when the toluene conversion was 90%. The toluene conversion was calculated as follows:

$$\text{Conversion of toluene} = \frac{\text{Toluene}_{in} - \text{Toluene}_{out}}{\text{Toluene}_{in}} \times 100\%$$

Generally, to test the stability of the catalyst, it is necessary to keep the reaction temperatures at high/low conversion of toluene for about 15 hours. And the concentration of the reactants was measured every hour to calculate the toluene conversion. In general, the specific equation for carbon balance was as follows and the error of carbon balance is about  $\pm 3\%$ :

$$\text{Carbon balance (\%)} = \frac{\text{Mole of the overall carbon fed (mol)}}{\text{Mole of the outflowed carbon (mol)}}$$

### 3. The calculation of r (reaction rate) and E<sub>a</sub> (Activation energy):

The catalytic performance could also be identified by apparent activation energy (E<sub>a</sub>), which was measured as follows [S1]:

$$\ln r = \frac{-E_a}{RT} + C \quad (1)$$

In equation (1), r represented the reaction rate (mol·s<sup>-1</sup>), T referred to the reaction temperatures, and C was a constant term.

$$r = \frac{F \times X_{\text{toluene}}}{W} \quad (2)$$

In equation (2), X<sub>toluene</sub> denoted the conversion of toluene, F indicated the feeding rate (mol·s<sup>-1</sup>), and W corresponded to the mass of catalyst. Therefore, the plot of ln r and 1000/T yielded the E<sub>a</sub> value.

We performed a kinetic study of the catalysts. The specific toluene reaction rates through the catalyst's specific surface area (R<sub>s</sub>) and the catalyst's mass (R<sub>m</sub>) were

calculated required the following equation [1]:

$$R_S = \frac{F \times \eta_{toluene}}{S_{BET}}$$

$$R_m = \frac{F \times \eta_{toluene}}{W}$$

$$\eta_{toluene} = \log \frac{1}{1 - \frac{X_{toluene}}{100}}$$

#### 4. The calculation of Turnover frequency (TOF):

Turnover frequency (TOF), defined as the number of toluene molecules converted per active site per second, is calculated according to the equation:

$$TOF = \frac{\frac{F_T * X_T}{(m_{cat} * w_{Co})}}{M_{Co}} * d_{Co} \quad (3)$$

Where  $F_T$  is the toluene flow rate (mol/h),  $X_T$  is the conversion of toluene,  $m_{cat}$  is the mass of the catalyst (g),  $w_{Co}$  is the mass percentage of Co in the catalysts,  $M_{Co}$  is the molar mass of Co (58.93 g/mol), and  $d_{Co}$  is the Co dispersion. And  $d_{Co}$  is calculated based on the ratio of the area occupied by the active site in the XPS spectrum.

**Table S1** TOF and r for benzene degradation over CoMnO<sub>x</sub> and CoMnO<sub>x</sub>@OTS

catalysts.

| Catalysts                     | $r_s$ ( $\mu\text{mol/s}^{-1} \text{m}^{-2}$ ) | TOF <sub>Co</sub> ( $\text{h}^{-1}$ ) at<br>320 °C |
|-------------------------------|------------------------------------------------|----------------------------------------------------|
| CoMnO <sub>x</sub>            | 2.58                                           | 0.84                                               |
| CoMnO <sub>x</sub> @OTS-<br>1 | 3.06                                           | 1.79                                               |
| CoMnO <sub>x</sub> @OTS-<br>2 | 3.29                                           | 2.06                                               |
| CoMnO <sub>x</sub> @OTS-<br>3 | 2.71                                           | 1.47                                               |

**Table S2** The amount and percentage of surface acid sites.

| Catalysts                 | Weak <sup>a</sup><br>peak areas | Moderate <sup>b</sup><br>Peak areas | Strong <sup>c</sup><br>peak<br>areas | (Moderate+Strong) <sup>d</sup><br>peak areas |
|---------------------------|---------------------------------|-------------------------------------|--------------------------------------|----------------------------------------------|
| CoMnO <sub>x</sub>        | 76.40                           | 8.15                                | 15.45                                | 23.60                                        |
| CoMnO <sub>x</sub> @OTS-1 | 35.12                           | 0                                   | 64.88                                | 64.88                                        |
| CoMnO <sub>x</sub> @OTS-2 | 30.21                           | 10.26                               | 59.53                                | 69.79                                        |
| CoMnO <sub>x</sub> @OTS-3 | 33.25                           | 15.32                               | 51.43                                | 66.75                                        |

<sup>a</sup> Desorption peak areas of weak acid.

<sup>b</sup> Desorption peak areas of moderate acid.

<sup>c</sup> Desorption peak areas of strong acid.

<sup>d</sup> Desorption peak areas of moderate and strong acid.



**Table S3** Surface atom ratios of CoMnO<sub>x</sub> and CoMnO<sub>x</sub>@OTS catalysts.

| Catalysts                   | Co (%) | Mn (%) | Mn/Co<br>(atomic ratio) |
|-----------------------------|--------|--------|-------------------------|
| CoMnO <sub>x</sub>          | 29.95  | 5.52   | 0.15                    |
| U-CoMnO <sub>x</sub>        | 25.31  | 3.98   | 0.13                    |
| CoMnO <sub>x</sub> @OTS-1   | 23.76  | 6.32   | 0.22                    |
| U-CoMnO <sub>x</sub> @OTS-1 | 17.05  | 2.06   | 0.10                    |

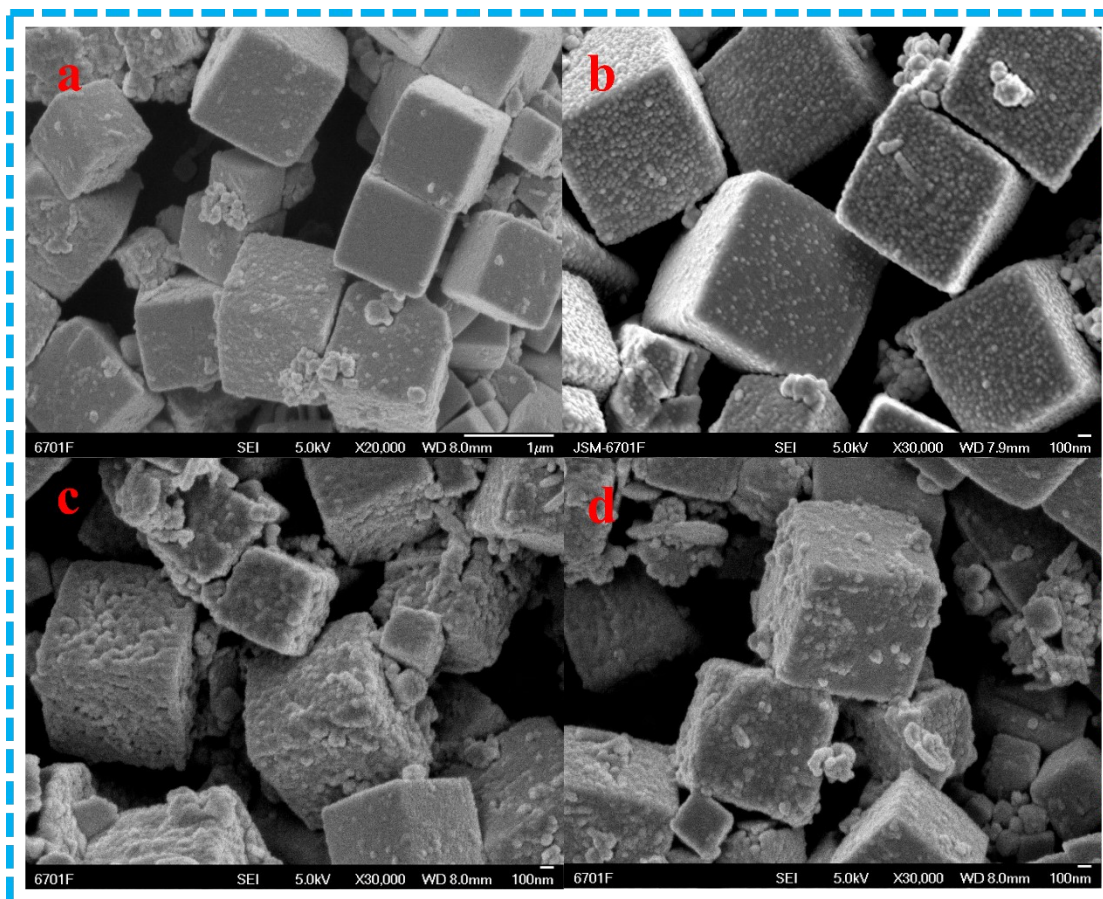

**Fig. S1.** FE-SEM images of (a) CoMnO<sub>x</sub>, (b) CoMnO<sub>x</sub>@OTS-1, (c) CoMnO<sub>x</sub>@OTS-2 and (d) CoMnO<sub>x</sub>@OTS-3.

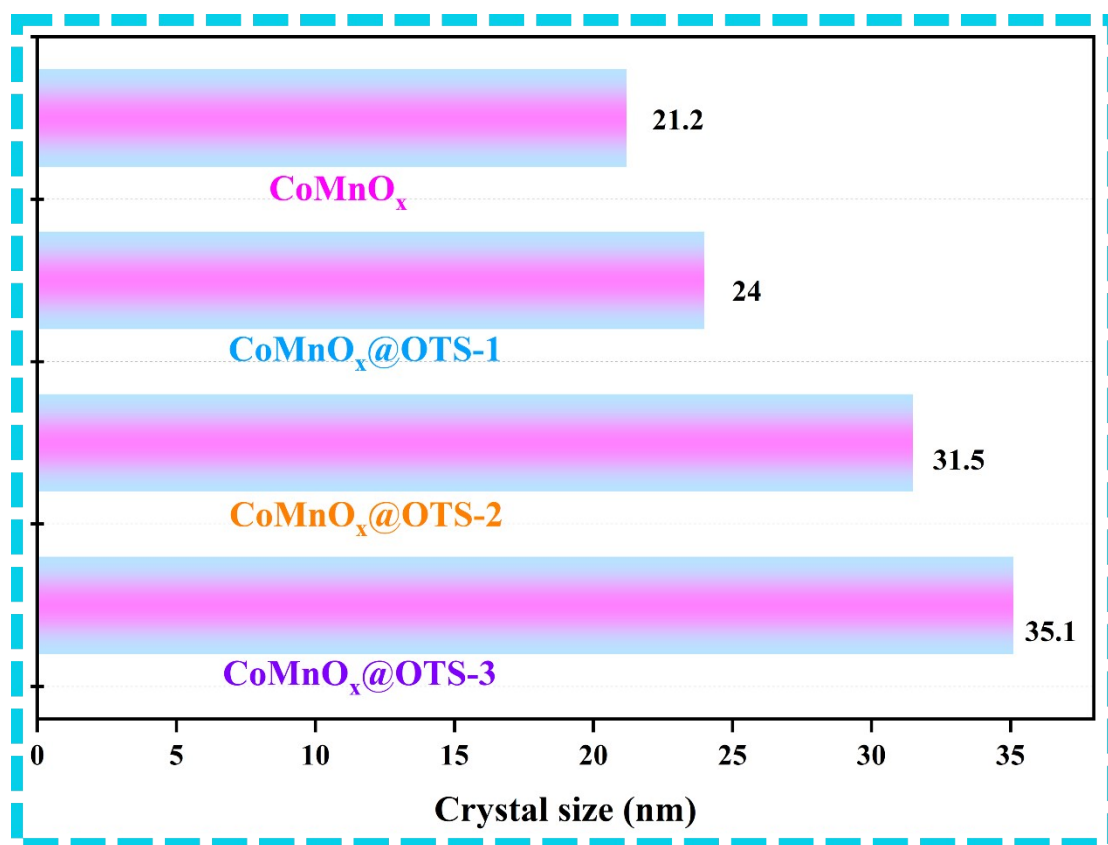

**Fig. S2.** Crystal size of CoMnO<sub>x</sub> and CoMnO<sub>x</sub>@OTS catalysts.

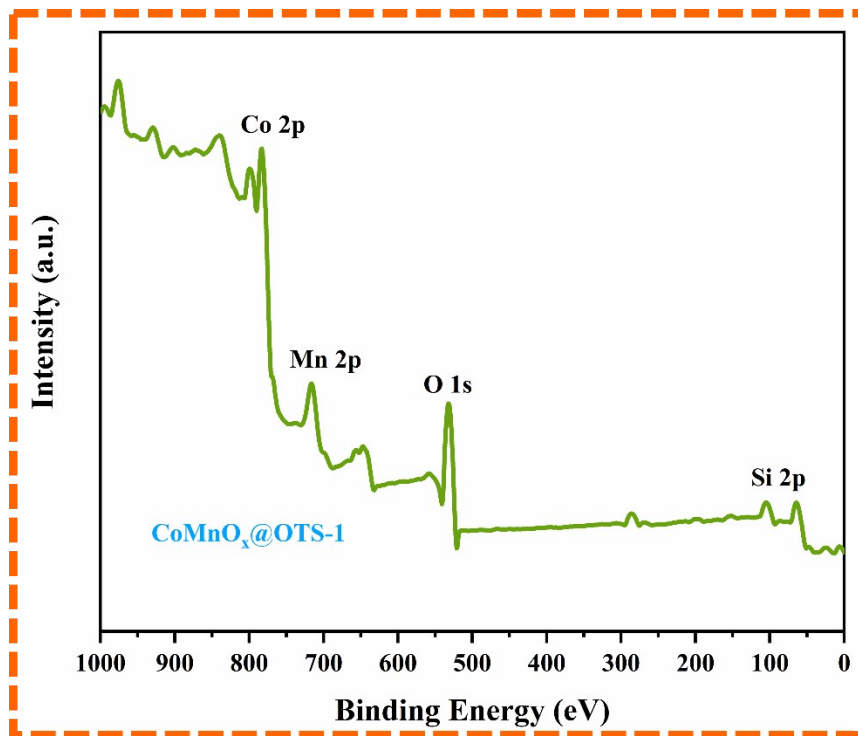

**Fig. S3.** Survey XPS Spectroscopy of CoMnO<sub>x</sub>@OTS-1 catalysts

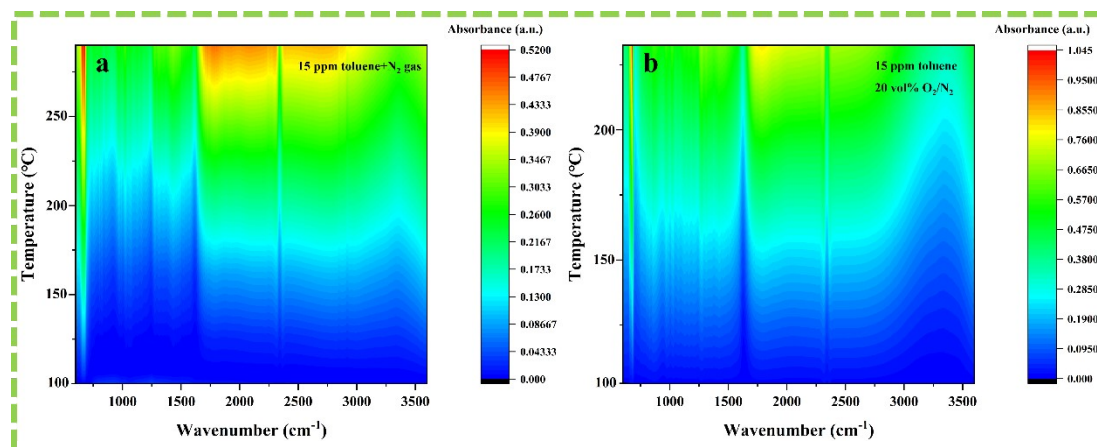

**Fig. S4.** (a) In-situ FTIR spectra for adsorption exposure to 15 ppm toluene in N<sub>2</sub> gas,  
(b) the flow of 15 ppm toluene and 20% O<sub>2</sub>/N<sub>2</sub> gas and
